# Supplementary material for: The Genetic Architecture of Hypertrophic Cardiomyopathy in Hungary: Analysis of 242 Patients with a Panel of 98 Genes
Source: MDPI journal article supplement (doi:10.3390/diagnostics12051132), 2022-05-03
Supplement: s1 [file s1]

**Supplementary Tables for the article:**

Róbert Sepp, Lidia Hategan, Beáta Csányi, János Borbás, Annamária Tringer, Eszter Dalma Pálinkás, Viktória Nagy, Hedvig Takács, Dóra Latinovics, Noémi Nyolczas, Attila Pálinkás, Réka Faludi, Miklós Rábai, Tamás Gábor Szabó, Dániel Czuriga, László Balogh, Róbert Halmosi, Attila Borbély, Tamás Habon, Zoltán Hegedűs, István Nagy. The genetic architecture of hypertrophic cardiomyopathy in Hungary: analysis of 242 patients with a panel of 98 genes

*Supplementary Table S1. Genes included in the panel for targeted resequencing.*

*Supplementary Table S2. Complete list and attributes of the variants identified in the study. The mitochondrial mutation is not included.*

*Supplementary Table S3. Gene-level variant analysis, with the number (n) and the percentage (%) of variants identified in different genes [percentage is given as per class of variants (i.e. per P/LP, per VUS, per B/LB variants)]. Definitive: genes with definitive evidence for HCM association; moderate: genes with moderate evidence for HCM association; P/LP: pathogenic/likely pathogenic variant; VUS: variant of unknown significance; B/LB: benign/likely benign variant; LVH: left ventricular hypertrophy.*

**Supplementary Table S1. Genes included in the panel for targeted resequencing.**

| <b>GENE SYMBOL</b>                                        | <b>GENE NAME</b>                            | <b>ENSG NUMBER</b> |
|-----------------------------------------------------------|---------------------------------------------|--------------------|
| <b>Genes with definitive evidence for HCM association</b> |                                             |                    |
| <i>MYBPC3</i>                                             | myosin binding protein C3                   | ENSG00000134571    |
| <i>MYH7</i>                                               | myosin heavy chain 7                        | ENSG0000009205     |
| <i>TNNT2</i>                                              | troponin T2, cardiac type                   | ENSG00000118194    |
| <i>TNNI3</i>                                              | troponin I3, cardiac type                   | ENSG00000129991    |
| <i>TPM1</i>                                               | tropomyosin 1                               | ENSG00000140416    |
| <i>ACTC1</i>                                              | actin alpha cardiac muscle 1                | ENSG00000159251    |
| <i>MYL2</i>                                               | myosin light chain 2                        | ENSG00000111245    |
| <i>MYL3</i>                                               | myosin light chain 3                        | ENSG00000160808    |
| <b>Genes with moderate evidence for HCM association</b>   |                                             |                    |
| <i>CSRP3</i>                                              | cysteine and glycine rich protein 3         | ENSG00000129170    |
| <i>JPH2</i>                                               | junctophilin 2                              | ENSG00000149596    |
| <i>TNNC1</i>                                              | troponin C1, slow skeletal and cardiac type | ENSG00000114854    |

| Intrinsic cardiomyopathy genes                                                 |                                                               |                 |
|--------------------------------------------------------------------------------|---------------------------------------------------------------|-----------------|
| <i>ACTN2</i>                                                                   | actinin alpha 2                                               | ENSG00000077522 |
| <i>PLN</i>                                                                     | phospholamban                                                 | ENSG00000198523 |
| Syndromic genes, where isolated left ventricular hypertrophy (LVH) may be seen |                                                               |                 |
| <i>DES</i>                                                                     | desmin                                                        | ENSG00000175084 |
| <i>FHL1</i>                                                                    | four and a half LIM domains 1                                 | ENSG00000022267 |
| <i>LAMP2</i>                                                                   | lysosomal associated membrane protein 2                       | ENSG00000005893 |
| <i>PRKAG2</i>                                                                  | protein kinase AMP-activated non-catalytic subunit<br>gamma 2 | ENSG00000106617 |
| <i>PTPN11</i>                                                                  | protein tyrosine phosphatase non-receptor type 11             | ENSG00000179295 |
| <i>RAF1</i>                                                                    | Raf-1 proto-oncogene, serine/threonine kinase                 | ENSG00000132155 |
| <i>TTR</i>                                                                     | transthyretin                                                 | ENSG00000118271 |
| Genes with definitive or moderate evidence for DCM or ARVC association         |                                                               |                 |
| <i>BAG3</i>                                                                    | BAG cochaperone 3                                             | ENSG00000151929 |
| <i>LMNA</i>                                                                    | lamin A/C                                                     | ENSG00000160789 |
| <i>RBM20</i>                                                                   | RNA binding motif protein 20                                  | ENSG00000203867 |

|                                                        |                                 |                 |
|--------------------------------------------------------|---------------------------------|-----------------|
| <i>TTN</i>                                             | titin                           | ENSG00000155657 |
| <i>DSP</i>                                             | desmoplakin                     | ENSG00000096696 |
| <i>PKP2</i>                                            | plakophilin 2                   | ENSG00000057294 |
| <i>DSG2</i>                                            | desmoglein 2                    | ENSG00000046604 |
| <i>DSC2</i>                                            | desmocollin 2                   | ENSG00000134755 |
| <i>JUP</i>                                             | junction plakoglobin            | ENSG00000173801 |
| <i>TMEM43</i>                                          | transmembrane protein 43        | ENSG00000170876 |
| <b>Genes with limited evidence for HCM association</b> |                                 |                 |
| <i>MYPN</i>                                            | myopalladin                     | ENSG00000138347 |
| <i>ANKRD1</i>                                          | ankyrin repeat domain 1         | ENSG00000148677 |
| <i>MYLK2</i>                                           | myosin light chain kinase 2     | ENSG00000101306 |
| <i>MYOZ2</i>                                           | myozenin 2                      | ENSG00000172399 |
| <i>NEXN</i>                                            | nexilin F-actin binding protein | ENSG00000162614 |
| <i>VCL</i>                                             | vinculin                        | ENSG00000035403 |
| <i>TRIM63</i>                                          | tripartite motif containing 63  | ENSG00000158022 |
| <i>MYH6</i>                                            | myosin heavy chain 6            | ENSG00000197616 |

|                                                                |                                                   |                 |
|----------------------------------------------------------------|---------------------------------------------------|-----------------|
| <i>PDLIM3</i>                                                  | PDZ and LIM domain 3                              | ENSG00000154553 |
| <i>TCAP</i>                                                    | titin-cap                                         | ENSG00000173991 |
| <i>MYOM1</i>                                                   | myomesin 1                                        | ENSG00000101605 |
| <i>CALR3</i>                                                   | calreticulin 3                                    | ENSG00000269058 |
| <b>Genes with limited evidence for DCM or ARVC association</b> |                                                   |                 |
| <i>ABCC9</i>                                                   | ATP binding cassette subfamily C member 9         | ENSG00000069431 |
| <i>CTF1</i>                                                    | cardiotrophin 1                                   | ENSG00000150281 |
| <i>DTNA</i>                                                    | dystrobrevin alpha                                | ENSG00000134769 |
| <i>EYA4</i>                                                    | EYA transcriptional coactivator and phosphatase 4 | ENSG00000112319 |
| <i>GATAD1</i>                                                  | GATA zinc finger domain containing 1              | ENSG00000157259 |
| <i>ILK</i>                                                     | integrin linked kinase                            | ENSG00000166333 |
| <i>LAMA4</i>                                                   | laminin subunit alpha 4                           | ENSG00000112769 |
| <i>LDB3</i>                                                    | LIM domain binding 3                              | ENSG00000122367 |
| <i>NEBL</i>                                                    | nebulette                                         | ENSG00000078114 |
| <i>PSEN2</i>                                                   | presenilin 2                                      | ENSG00000143801 |
| <i>SGCD</i>                                                    | sarcoglycan delta                                 | ENSG00000170624 |

| Syndromic genes, where LVH is seen with overt syndromic features |                                                          |                 |
|------------------------------------------------------------------|----------------------------------------------------------|-----------------|
| <i>CAV3</i>                                                      | caveolin 3                                               | ENSG00000182533 |
| <i>CRYAB</i>                                                     | crystallin alpha B                                       | ENSG00000109846 |
| <i>FXN</i>                                                       | frataxin                                                 | ENSG00000165060 |
| <i>GAA</i>                                                       | alpha glucosidase                                        | ENSG00000171298 |
| Other genes                                                      |                                                          |                 |
| <i>ACADVL</i>                                                    | acyl-CoA dehydrogenase very long chain                   | ENSG00000072778 |
| <i>AGL</i>                                                       | amylo-alpha-1, 6-glucosidase, 4-alpha-glucanotransferase | ENSG00000162688 |
| <i>ATP5E</i>                                                     | ATP synthase F1 subunit epsilon                          | ENSG00000124172 |
| <i>BRAF</i>                                                      | B-Raf proto-oncogene, serine/threonine kinase            | ENSG00000157764 |
| <i>CASQ2</i>                                                     | calsequestrin 2                                          | ENSG00000118729 |
| <i>CBL</i>                                                       | Cbl proto-oncogene                                       | ENSG00000110395 |
| <i>COA5</i>                                                      | cytochrome c oxidase assembly factor 5                   | ENSG00000183513 |
| <i>CTNNA3</i>                                                    | catenin alpha 3                                          | ENSG00000183230 |
| <i>DMD</i>                                                       | dystrophin                                               | ENSG00000198947 |
| <i>DMPK</i>                                                      | DM1 protein kinase                                       | ENSG00000104936 |

|                |                                                   |                 |
|----------------|---------------------------------------------------|-----------------|
| <i>DNAJC19</i> | DnaJ heat shock protein family (Hsp40) member C19 | ENSG00000205981 |
| <i>DNM1L</i>   | dynamin 1 like                                    | ENSG00000087470 |
| <i>DOLK</i>    | dolichol kinase                                   | ENSG00000175283 |
| <i>EMD</i>     | emerin                                            | ENSG00000102119 |
| <i>FHL2</i>    | four and a half LIM domains 2                     | ENSG00000115641 |
| <i>FKTN</i>    | fukutin                                           | ENSG00000106692 |
| <i>FOXRED1</i> | FAD dependent oxidoreductase domain containing 1  | ENSG00000110074 |
| <i>GUSB</i>    | glucuronidase beta                                | ENSG00000169919 |
| <i>HFE</i>     | homeostatic iron regulator                        | ENSG00000010704 |
| <i>HRAS</i>    | HRas proto-oncogene, GTPase                       | ENSG00000174775 |
| <i>KRAS</i>    | KRAS proto-oncogene, GTPase                       | ENSG00000133703 |
| <i>MAP2K1</i>  | mitogen-activated protein kinase kinase 1         | ENSG00000169032 |
| <i>MAP2K2</i>  | mitogen-activated protein kinase kinase 2         | ENSG00000126934 |
| <i>MIB1</i>    | MIB E3 ubiquitin protein ligase 1                 | ENSG00000101752 |
| <i>MRPL3</i>   | mitochondrial ribosomal protein L3                | ENSG00000114686 |
| <i>NRAS</i>    | NRAS proto-oncogene, GTPase                       | ENSG00000213281 |

|                |                                                        |                 |
|----------------|--------------------------------------------------------|-----------------|
| <i>PSEN1</i>   | presenilin 1                                           | ENSG00000080815 |
| <i>SCO2</i>    | synthesis of cytochrome C oxidase 2                    | ENSG00000284194 |
| <i>SDHA</i>    | succinate dehydrogenase complex flavoprotein subunit A | ENSG00000073578 |
| <i>SHOC2</i>   | SHOC2 leucine rich repeat scaffold protein             | ENSG00000108061 |
| <i>SLC25A3</i> | solute carrier family 25 member 3                      | ENSG00000075415 |
| <i>SOS1</i>    | SOS Ras/Rac guanine nucleotide exchange factor 1       | ENSG00000115904 |
| <i>SPRED1</i>  | sprouty related EVH1 domain containing 1               | ENSG00000166068 |
| <i>SYNE1</i>   | spectrin repeat containing nuclear envelope protein 1  | ENSG00000131018 |
| <i>SYNE2</i>   | spectrin repeat containing nuclear envelope protein 2  | ENSG00000054654 |
| <i>TAZ</i>     | ZNF561 antisense RNA 1 (head to head)                  | ENSG00000267106 |
| <i>TGFB3</i>   | transforming growth factor beta 3                      | ENSG00000119699 |
| <i>TMEM70</i>  | transmembrane protein 70                               | ENSG00000175606 |
| <i>TMPO</i>    | thymopoietin                                           | ENSG00000120802 |
| <i>TSFM</i>    | Ts translation elongation factor, mitochondrial        | ENSG00000123297 |
| <i>TXNRD2</i>  | thioredoxin reductase 2                                | ENSG00000184470 |



*Supplementary Table S2.* Complete list and attributes of the variants identified in the study. The mitochondrial mutation is not included.

| Gene         | Variant type | coding HGVS | protein HGVS | ENST                        | ENSP                          | Final verdict | Plus items for final verdict | Cardio Classifier | Cardio Classifier items | ClinVar max | ClinVar score | ClinVar entry, n | Novel |
|--------------|--------------|-------------|--------------|-----------------------------|-------------------------------|---------------|------------------------------|-------------------|-------------------------|-------------|---------------|------------------|-------|
| <b>ACTC1</b> |              |             |              |                             |                               |               |                              |                   |                         |             |               |                  |       |
| ACTC1        | missense     | c.281A>T    | p.Asn94Ile   | ENST00000290378:c.281A>T    | ENSP00000290378:p.Asn94Ile    | pathogenic    | PS4, PP1                     | VUS               | PM2, PP2, PP3           | 4           | 4             | 1                | no    |
| ACTC1        | missense     | c.67T>C     | p.Phe23Leu   | ENST00000290378:c.67T>C     | ENSP00000290378:p.Phe23Leu    | VUS           | -                            | VUS               | PM2, PP2, PP3           | 4           | 3,3           | 3                | no    |
| ACTC1        | missense     | c.698C>T    | p.Ala233Val  | ENST00000290378:c.698C>T    | ENSP00000290378:p.Ala233Val   | VUS           | -                            | VUS               | PM2, PP2, PP3           | -           | -             | -                | yes   |
| <b>ACTN2</b> |              |             |              |                             |                               |               |                              |                   |                         |             |               |                  |       |
| ACTN2        | missense     | c.2677G>A   | p.Asp893Asn  | ENST00000366578.6:c.2677G>A | ENSP00000355537.4:p.Asp893Asn | VUS           | -                            | -                 | -                       | 3           | 2,67          | 3                | no    |
| ACTN2        | missense     | c.893G>A    | p.Arg298His  | ENST00000366578.6:c.893G>A  | ENSP00000355537.4:p.Arg298His | likely benign | -                            | -                 | -                       | 3           | 2,36          | 11               | no    |
| ACTN2        | missense     | c.1930G>A   | p.Ala644Thr  | ENST00000366578:c.1930G>A   | ENSP00000355537:p.Ala644Thr   | VUS           | -                            | -                 | -                       | 3           | 3             | 8                | no    |
| ACTN2        | missense     | c.2147C>T   | p.Thr716Met  | ENST00000366578:c.2147C>T   | ENSP00000355537:p.Thr716Met   | likely benign | -                            | -                 | -                       | 3           | 2,28          | 14               | no    |
| <b>CSRP3</b> |              |             |              |                             |                               |               |                              |                   |                         |             |               |                  |       |
| CSRP3        | missense     | c.10T>C     | p.Trp4Arg    | ENST00000533783:c.10T>C     | ENSP00000431813:p.Trp4Arg     | benign        | -                            | benign            | -                       | 3           | 1,91          | 12               | no    |
| CSRP3        | missense     | c.206A>G    | p.Lys69Arg   | ENST00000533783:c.206A>G    | ENSP00000431813:p.Lys69Arg    | VUS           | -                            | VUS               | PM2, PP3                | 3           | 3             | 5                | no    |
| CSRP3        | missense     | c.136A>C    | p.Ser46Arg   | ENST00000533783:c.136A>C    | ENSP00000431813:p.Ser46Arg    | VUS           | -                            | VUS               | PM2, PP3                | 5           | 3,4           | 5                | no    |
| CSRP3        | missense     | c.208G>T    | p.Gly70Trp   | ENST00000533783:c.208G>T    | ENSP00000431813:p.Gly70Trp    | VUS           | -                            | VUS               | PP3                     | 3           | 3             | 3                | no    |
| <b>DES</b>   |              |             |              |                             |                               |               |                              |                   |                         |             |               |                  |       |
| DES          | missense     | c.1216C>T   | p.Arg406Trp  | ENST00000373960:c.1216C>T   | ENSP00000363071:p.Arg406Trp   | pathogenic    | -                            | -                 | -                       | 5           | 4,9           | 10               | no    |
| DES          | missense     | c.1286G>A   | p.Arg429Gln  | ENST00000373960:c.1286G>A   | ENSP00000363071:p.Arg429Gln   | VUS           | -                            | -                 | -                       | 3           | 3             | 4                | no    |
| DES          | missense     | c.206T>C    | p.Leu69Pro   | ENST00000373960:c.206T>C    | ENSP00000363071:p.Leu69Pro    | VUS           | -                            | -                 | -                       | -           | -             | -                | yes   |
| DES          | missense     | c.250G>A    | p.Gly84Ser   | ENST00000373960:c.250G>A    | ENSP00000363071:p.Gly84Ser    | VUS           | -                            | -                 | -                       | 3           | 2,89          | 9                | no    |
| DES          | missense     | c.569T>G    | p.Leu190Arg  | ENST00000373960:c.569T>G    | ENSP00000363071:p.Leu190Arg   | VUS           | -                            | -                 | -                       | -           | -             | -                | yes   |
| DES          | missense     | c.638C>T    | p.Ala213Val  | ENST00000373960:c.638C>T    | ENSP00000363071:p.Ala213Val   | benign        | -                            | -                 | -                       | 3           | 1,44          | 16               | no    |
| DES          | missense     | c.728A>G    | p.His243Arg  | ENST00000373960:c.728A>G    | ENSP00000363071:p.His243Arg   | VUS           | -                            | -                 | -                       | 3           | 3             | 4                | no    |

| FHL1   |                  |                  |                    |                                  |                                      |                   |          |                   |                    |   |      |    |     |
|--------|------------------|------------------|--------------------|----------------------------------|--------------------------------------|-------------------|----------|-------------------|--------------------|---|------|----|-----|
| FHL1   | missense         | c.283C>T         | p.Arg95Trp         | ENST00000370674.3:c.283C>T       | ENSP00000359708.1:p.Arg95Trp         | VUS               | -        | VUS               | BS1, PP3, PP2      | 2 | 1,67 | 3  | no  |
| FHL1   | nonsense         | c.286G>T         | p.Glu96*           | ENST00000370690:c.286G>T         | ENSP00000359724:p.Glu96*             | likely pathogenic | -        | likely pathogenic | PVS1, PM2          | - | -    | -  | yes |
| JPH2   |                  |                  |                    |                                  |                                      |                   |          |                   |                    |   |      |    |     |
| JPH2   | missense         | c.1522A>C        | p.Ser508Arg        | ENST00000372980:c.1522A>C        | ENSP00000362071:p.Ser508Arg          | VUS               | -        | -                 | -                  | - | -    | -  | yes |
| JPH2   | missense         | c.1801A>C        | p.Thr601Pro        | ENST00000372980:c.1801A>C        | ENSP00000362071:p.Thr601Pro          | VUS               | -        | -                 | -                  | - | -    | -  | yes |
| JPH2   | missense         | c.281A>G         | p.Tyr94Cys         | ENST00000372980:c.281A>G         | ENSP00000362071:p.Tyr94Cys           | VUS               | -        | -                 | -                  | - | -    | -  | yes |
| JPH2   | missense         | c.572C>G         | p.Pro191Arg        | ENST00000372980:c.572C>G         | ENSP00000362071:p.Pro191Arg          | likely benign     | -        | -                 | -                  | 3 | 1,8  | 10 | no  |
| JPH2   | missense         | c.605T>G         | p.Leu202Arg        | ENST00000372980:c.605T>G         | ENSP00000362071:p.Leu202Arg          | VUS               | -        | -                 | -                  | - | -    | -  | yes |
| JPH2   | missense         | c.856A>G         | p.Thr286Ala        | ENST00000372980:c.856A>G         | ENSP00000362071:p.Thr286Ala          | likely benign     | -        | -                 | -                  | 2 | 2    | 5  | no  |
| LAMP2  |                  |                  |                    |                                  |                                      |                   |          |                   |                    |   |      |    |     |
| LAMP2  | intronic variant | c.1093+2514G>A   | -                  | ENST00000200639:c.1093+2514G>A   | -                                    | benign            | -        | -                 | -                  | 3 | 1,46 | 13 | no  |
| LAMP2  | missense         | c.661G>A         | p.Gly221Arg        | ENST00000200639:c.661G>A         | ENSP00000200639:p.Gly221Arg          | benign            | -        | benign            | ExAC frequency     | 3 | 1,58 | 11 | no  |
| LAMP2  | missense         | c.755T>G         | p.Ile252Ser        | ENST00000200639:c.755T>G         | ENSP00000200639:p.Ile252Ser          | benign            | -        | benign            | ExAC frequency     | 2 | 1,54 | 13 | no  |
| MYBPC3 |                  |                  |                    |                                  |                                      |                   |          |                   |                    |   |      |    |     |
| MYBPC3 | missense         | c.1483C>T        | p.Arg495Trp        | ENST00000545968.6:c.1483C>T      | ENSP00000442795.1:p.Arg495Trp        | likely pathogenic | -        | likely pathogenic | PM2, PM5, PP2, PP3 | 5 | 4,5  | 8  | no  |
| MYBPC3 | missense         | c.1484G>A        | p.Arg495Gln        | ENST00000545968.6:c.1484G>A      | ENSP00000442795:p.Arg495Gln          | pathogenic        | PM5      | likely pathogenic | PS4, PM2, PP1, PP2 | 5 | 4,8  | 22 | no  |
| MYBPC3 | frameshift       | c.1776_1777delGT | p.Ser593ProfsTer11 | ENST00000545968.6:c.1776_1777del | ENSP00000442795.1:p.Ser593ProfsTer11 | pathogenic        | PS4, PP1 | likely pathogenic | PVS1, PM2          | 5 | 5    | 4  | no  |
| MYBPC3 | missense         | c.1855G>A        | p.Glu619Lys        | ENST00000545968.6:c.1855G>A      | ENSP00000442795:p.Glu619Lys          | benign            | -        | benign            | ExAC frequency     | 3 | 2    | 16 | no  |
| MYBPC3 | nonsense         | c.2048G>A        | p.Trp683X          | ENST00000545968.6:c.2048G>A      | ENSP00000442795:p.Trp683*            | likely pathogenic | -        | likely pathogenic | PVS1, PM2          | 5 | 4,6  | 3  | no  |
| MYBPC3 | frameshift       | c.2373dupG       | p.Trp792ValfsTer41 | ENST00000545968.6:c.2373dup      | ENSP00000442795:p.Trp792fs           | pathogenic        | -        | pathogenic        | PVS1, PS4, PM2     | 5 | 5    | 24 | no  |
| MYBPC3 | missense         | c.2429G>A        | p.Arg810His        | ENST00000545968.6:c.2429G>A      | ENSP00000442795:p.Arg810His          | likely pathogenic | -        | likely pathogenic | PS4, PM2, PP2, PP1 | 4 | 3,4  | 9  | no  |
| MYBPC3 | missense         | c.2459G>C        | p.Arg820Pro        | ENST00000545968.6:c.2459G>C      | ENSP00000442795.1:p.Arg820Pro        | VUS               | -        | VUS               | PM2, PP2           | 3 | 3    | 1  | no  |
| MYBPC3 | missense         | c.2543C>A        | p.Ala848Glu        | ENST00000545968.6:c.2543C>A      | ENSP00000442795.1:p.Ala848Glu        | VUS               | -        | VUS               | PM2, PP2, PP3      | 3 | 3    | 3  | no  |

|        |                      |                   |                    |                                    |                                      |                   |          |                   |                          |   |     |    |     |
|--------|----------------------|-------------------|--------------------|------------------------------------|--------------------------------------|-------------------|----------|-------------------|--------------------------|---|-----|----|-----|
| MYBPC3 | nonsense             | c.2827C>T         | p.Arg943X          | ENST00000545968.6:c.2827C>T        | ENSP00000442795:p.Arg943*            | pathogenic        | -        | pathogenic        | PVS1, PS4, PP1, PM2      | 5 | 5   | 17 | no  |
| MYBPC3 | frameshift           | c.2864_2865delCT  | p.Pro955ArgfsTer95 | ENST00000545968.6:c.2864_2865del   | ENSP00000442795.1:p.Pro955ArgfsTer   | pathogenic        | -        | pathogenic        | PVS1, PS3, PS4, PP1, PM2 | 5 | 4,7 | 18 | no  |
| MYBPC3 | missense             | c.2870C>G         | p.Thr957Ser        | ENST00000545968.6:c.2870C>G        | ENSP00000442795.1:p.Thr957Ser        | benign            | -        | benign            | ExAC frequency           | 3 | 2,3 | 18 | no  |
| MYBPC3 | missense             | c.2873C>T         | p.Thr958Ile        | ENST00000545968.6:c.2873C>T        | ENSP00000442795.1:p.Thr958Ile        | VUS               | -        | VUS               | PP2, BP4                 | 3 | 2,8 | 13 | no  |
| MYBPC3 | frameshift           | c.2992_2993dupCA  | p.Gln998HisfsTer9  | ENST00000545968.6:c.2992_2993dupCA | ENSP00000442795:p.Gln998fs           | likely pathogenic | -        | likely pathogenic | PVS1, PM2                | - | -   | -  | yes |
| MYBPC3 | missense             | c.2992C>G         | p.Gln998Glu        | ENST00000545968.6:c.2992C>G        | ENSP00000442795.1:p.Gln998Glu        | benign            | -        | benign            | ExAC frequency           | 2 | 2,5 | 20 | no  |
| MYBPC3 | frameshift           | c.3039_3040dupCC  | p.Leu1014ProfsTer7 | ENST00000545968.6:c.3039_3040dupCC | ENSP00000442795:p.Leu1014fs          | likely pathogenic | -        | likely pathogenic | PVS1, PM2                | - | -   | -  | yes |
| MYBPC3 | missense             | c.3065G>C         | p.Arg1022Pro       | ENST00000545968.6:c.3065G>C        | ENSP00000442795:p.Arg1022Pro         | VUS               | -        | VUS               | PM2, PP2, PP3            | 5 | 3,6 | 8  | no  |
| MYBPC3 | missense             | c.3097C>T         | p.Arg1033Trp       | ENST00000545968.6:c.3097C>T        | ENSP00000442795.1:p.Arg1033Trp       | VUS               | -        | VUS               | PM2, PP2, PP3            | 3 | 3   | 6  | no  |
| MYBPC3 | missense             | c.3098G>A         | p.Arg1033Gln       | ENST00000545968.6:c.3098G>A        | ENSP00000442795.1:p.Arg1033Gln       | VUS               | -        | VUS               | PM2, PP3                 | 3 | 3   | 5  | no  |
| MYBPC3 | frameshift           | c.3166dupG        | p.Ala1056GlyfsTer9 | ENST00000545968.6:c.3166dup        | ENSP00000442795.1:p.Ala1056GlyfsTer9 | pathogenic        | PS4      | likely pathogenic | PVS1, PM2                | 5 | 5   | 2  | no  |
| MYBPC3 | splice donor variant | c.3190+1G>A       | -                  | ENST00000545968.6:c.3190+1G>A      | -                                    | pathogenic        | PS4      | likely pathogenic | PVS1, PM2                | 5 | 5   | 5  | no  |
| MYBPC3 | inframe indel        | c.3407_3409delACT | p.Tyr1136del       | ENST00000545968.6:c.3407_3409del   | ENSP00000442795.1:p.Tyr1136del       | likely pathogenic | PS4, PP1 | VUS               | PM2, PM4                 | 5 | 3,8 | 9  | no  |
| MYBPC3 | frameshift           | c.3476_3477delTT  | p.Phe1159TyrfsTer9 | ENST00000545968.6:c.3476_3477del   | ENSP00000442795.1:p.Phe1159TyrfsTer9 | likely pathogenic | -        | likely pathogenic | PVS1, PM2                | 5 | 5   | 1  | no  |
| MYBPC3 | nonsense             | c.3642G>A         | p.Trp1214X         | ENST00000545968.6:c.3642G>A        | ENSP00000442795.1:p.Trp1214Ter       | likely pathogenic | -        | likely pathogenic | PVS1, PM2                | 5 | 4,6 | 7  | no  |
| MYBPC3 | nonsense             | c.3697C>T         | p.Gln1233Ter       | ENST00000545968.6:c.3697C>T        | ENSP00000442795.1:p.Gln1233Ter       | pathogenic        | -        | pathogenic        | PVS1, PS4, PP1, PM2      | 5 | 4,9 | 12 | no  |
| MYBPC3 | nonsense             | c.3811C>T         | p.Arg1271X         | ENST00000545968.6:c.3811C>T        | ENSP00000442795:p.Arg1271*           | pathogenic        | PS4      | likely pathogenic | PVS1, PM2                | 5 | 4,9 | 9  | no  |
| MYBPC3 | frameshift           | c.431_432delGT    | p.Gly144AlafsTer8  | ENST00000545968.6:c.431_432del     | ENSP00000442795.1:p.Gly144AlafsTer8  | likely pathogenic | -        | likely pathogenic | PVS1, PM2                | 5 | 5   | 1  | no  |
| MYBPC3 | splice donor variant | c.505+1G>A        | -                  | ENST00000545968.6:c.505+1G>A       | -                                    | likely pathogenic | -        | likely pathogenic | PVS1, PM2                | 5 | 4,5 | 2  | no  |
| MYBPC3 | missense             | c.565G>A          | p.Val189Ile        | ENST00000545968.6:c.565G>A         | ENSP00000442795.1:p.Val189Ile        | benign            | -        | benign            | ExAC frequency           | 2 | 1,6 | 15 | no  |
| MYBPC3 | missense             | c.649A>G          | p.Ser217Gly        | ENST00000545968.6:c.649A>G         | ENSP00000442795.1:p.Ser217Gly        | benign            | -        | benign            | ExAC frequency           | 3 | 1,4 | 11 | no  |
| MYBPC3 | splice donor variant | c.821+1G>A        | -                  | ENST00000545968.6:c.821+1G>C       | -                                    | pathogenic        | PS4, PP1 | likely pathogenic | PVS1, PM2                | 5 | 5   | 1  | no  |
| MYBPC3 | missense             | c.977G>A          | p.Arg326Gln        | ENST00000545968.6:c.977G>A         | ENSP00000442795.1:p.Arg326Gln        | benign            | -        | benign            | ExAC frequency           | 2 | 1,3 | 19 | no  |
| MYBPC3 | frameshift           | c.1293delC        | p.Asp431GlufsTer19 | ENST00000545968:c.1293delC         | ENSP00000442795:p.Asp431fs           | likely pathogenic | -        | likely pathogenic | PVS1, PM2                | - | -   | -  | yes |

|             |            |           |                   |                             |                                |                   |                                    |                   |                                   |   |     |    |     |
|-------------|------------|-----------|-------------------|-----------------------------|--------------------------------|-------------------|------------------------------------|-------------------|-----------------------------------|---|-----|----|-----|
| MYBPC3      | missense   | c.238G>A  | p.Ala80Thr        | ENST00000545968:c.238G>A    | ENSP00000442795:p.Ala80Thr     | VUS               | -                                  | VUS               | PM2, PP2                          | 3 | 3   | 2  | no  |
| MYBPC3      | missense   | c.3737T>C | p.Phe1246Ser      | ENST00000545968:c.3737T>C   | ENSP00000442795:p.Phe1246Ser   | VUS               | -                                  | VUS               | PM2, PP2                          | - | -   | -  | yes |
| MYBPC3      | missense   | c.506G>T  | p.Gly169Val       | ENST00000545968:c.506G>T    | ENSP00000442795:p.Gly169Val    | VUS               | -                                  | VUS               | PM2, PP2, PP3                     | - | -   | -  | yes |
| MYBPC3      | frameshift | c.73delA  | p.Ser25AlafsTer14 | ENST00000545968:c.73delA    | ENSP00000442795:p.Ser25fs      | likely pathogenic | -                                  | likely pathogenic | PVS1, PM2                         | - | -   | -  | yes |
| <b>MYH7</b> |            |           |                   |                             |                                |                   |                                    |                   |                                   |   |     |    |     |
| MYH7        | missense   | c.1063G>A | p.Ala355Thr       | ENST00000355349.4:c.1063G>A | ENSP00000347507:p.Ala355Thr    | pathogenic        | -                                  | pathogenic        | PS4, PM1, PM2, PP1, PP3           | 5 | 4,5 | 10 | no  |
| MYH7        | missense   | c.1208G>A | p.Arg403Gln       | ENST00000355349.4:c.1208G>A | ENSP00000347507:p.Arg403Gln    | pathogenic        | -                                  | pathogenic        | PS3, PS4, PM1, PM2, PM5, PP1, PP3 | 5 | 5   | 13 | no  |
| MYH7        | nonsense   | c.1792A>T | p.Lys598X         | ENST00000355349.4:c.1792A>G | ENSP00000347507:p.Lys598*      | VUS               | -                                  | VUS               | PM2                               | - | -   | -  | yes |
| MYH7        | missense   | c.1987C>T | p.Arg663Cys       | ENST00000355349.4:c.1987C>T | ENSP00000347507.3:p.Arg663Cys  | pathogenic        | -                                  | pathogenic        | PS4, PP3, PM1, PM2, PM5           | 5 | 5   | 11 | no  |
| MYH7        | missense   | c.2146G>A | p.Gly716Arg       | ENST00000355349.4:c.2146G>A | ENSP00000347507:p.Gly716Arg    | pathogenic        | -                                  | pathogenic        | PS4, PM1, PM2, PM6, PP1, PP3      | 5 | 4,9 | 10 | no  |
| MYH7        | missense   | c.2156G>A | p.Arg719Gln       | ENST00000355349.4:c.2156G>A | ENSP00000347507.3:p.Arg719Gln  | pathogenic        | -                                  | pathogenic        | PS4, PP1, PM1, PM2, PM5, PP3      | 5 | 4,8 | 14 | no  |
| MYH7        | missense   | c.2207T>C | p.Ile736Thr       | ENST00000355349.4:c.2207T>C | ENSP00000347507:p.Ile736Thr    | pathogenic        | -                                  | pathogenic        | PVS1, PM1, PM2, PP1               | 5 | 5   | 12 | no  |
| MYH7        | missense   | c.2348G>A | p.Arg783His       | ENST00000355349.4:c.2348G>A | ENSP00000347507.3:p.Arg783His  | likely pathogenic | -                                  | likely pathogenic | PS4, PM1, PM2                     | 4 | 4   | 6  | no  |
| MYH7        | missense   | c.2710C>T | p.Arg904Cys       | ENST00000355349.4:c.2710C>T | ENSP00000347507:p.Arg904Cys    | pathogenic        | PS4_Moderate, PP1_Strong, PM6, PM5 | VUS               | PM1, PM2, PP3                     | 5 | 4,5 | 6  | no  |
| MYH7        | missense   | c.2770G>A | p.Glu924Lys       | ENST00000355349.4:c.2770G>A | ENSP00000347507.3:p.Glu924Lys  | pathogenic        | -                                  | pathogenic        | PS2, PS3, PS4, PM1, PM2, PP1, PP3 | 5 | 4,8 | 12 | no  |
| MYH7        | missense   | c.2785G>A | p.Glu929Lys       | ENST00000355349.4:c.2785G>A | ENSP00000347507:p.Glu929Lys    | likely pathogenic | PS4                                | VUS               | PM1, PM2, PP3                     | 4 | 4   | 2  | no  |
| MYH7        | missense   | c.3158G>A | p.Arg1053Gln      | ENST00000355349.4:c.3158G>A | ENSP00000347507:p.Arg1053Gln   | likely pathogenic | -                                  | likely pathogenic | PS4, PM2, PP1, PP3                | 5 | 4,7 | 6  | no  |
| MYH7        | missense   | c.3346G>A | p.Glu1116Lys      | ENST00000355349.4:c.3346G>A | ENSP00000347507:p.Glu1116Lys   | VUS               | -                                  | VUS               | PM2, PP2                          | 5 | 4   | 3  | no  |
| MYH7        | missense   | c.3455A>C | p.Glu1152Ala      | ENST00000355349.4:c.3455A>T | ENSP00000347507.3:p.Glu1152Val | VUS               | -                                  | VUS               | PM2, PP2, PP3                     | 3 | 3   | 3  | no  |
| MYH7        | missense   | c.4130C>T | p.Thr1377Met      | ENST00000355349.4:c.4130C>T | ENSP00000347507.3:p.Thr1377Met | likely pathogenic | -                                  | likely pathogenic | PS4, PM2, PP3                     | 5 | 4,2 | 10 | no  |
| MYH7        | missense   | c.4348G>A | p.Asp1450Asn      | ENST00000355349.4:c.4348G>A | ENSP00000347507.3:p.Asp1450Asn | VUS               | -                                  | VUS               | PM2, PP3                          | 3 | 3   | 5  | no  |
| MYH7        | missense   | c.4472C>G | p.Ser1491Cys      | ENST00000355349.4:c.4472C>G | ENSP00000347507:p.Ser1491Cys   | benign            | -                                  | benign            | ExAC frequency                    | 2 | 1,2 | 20 | no  |
| MYH7        | missense   | c.505A>G  | p.Arg169Gly       | ENST00000355349.4:c.505A>G  | ENSP00000347507:p.Arg169Gly    | likely pathogenic | PP1, PS4                           | VUS               | PM2, PP2, PP3                     | 4 | 4   | 2  | no  |

|             |          |           |              |                             |                               |                   |     |                   |                         |   |     |    |     |
|-------------|----------|-----------|--------------|-----------------------------|-------------------------------|-------------------|-----|-------------------|-------------------------|---|-----|----|-----|
| MYH7        | missense | c.5135G>A | p.Arg1712Gln | ENST00000355349.4:c.5135G>A | ENSP00000347507:p.Arg1712Gln  | likely pathogenic | -   | likely pathogenic | PS4, PM1, PM2, PP1, PP3 | 5 | 4   | 18 | no  |
| MYH7        | missense | c.596C>T  | p.Ala199Val  | ENST00000355349.4:c.596C>T  | ENSP00000347507:p.Ala199Val   | likely pathogenic | PS4 | VUS               | PM1, PM2, PP3           | 5 | 4,3 | 4  | no  |
| MYH7        | missense | c.715G>A  | p.Asp239Asn  | ENST00000355349.4:c.715G>A  | ENSP00000347507:p.Asp239Asn   | pathogenic        | -   | pathogenic        | PS4, PM1, PM2, PP1      | 5 | 4,5 | 10 | no  |
| MYH7        | missense | c.1988G>A | p.Arg663His  | ENST00000355349:c.1988G>A   | ENSP00000347507:p.Arg663His   | pathogenic        | -   | pathogenic        | PS4, PP1, PM2, PM1      | 5 | 4,9 | 28 | no  |
| MYH7        | missense | c.2092G>A | p.Val698Met  | ENST00000355349:c.2092G>A   | ENSP00000347507:p.Val698Met   | VUS               | -   | VUS               | PM1, PM2, PP3           | - | -   | -  | yes |
| MYH7        | missense | c.2631G>T | p.Met877Ile  | ENST00000355349:c.2631G>T   | ENSP00000347507:p.Met877Ile   | VUS               | -   | VUS               | PM1, PM2                | - | -   | -  | yes |
| MYH7        | missense | c.3116A>G | p.Glu1039Gly | ENST00000355349:c.3116A>G   | ENSP00000347507:p.Glu1039Gly  | VUS               | -   | VUS               | PP2, PP3                | 3 | 3   | 3  | no  |
| MYH7        | missense | c.440G>T  | p.Arg147Met  | ENST00000355349:c.440G>T    | ENSP00000347507:p.Arg147Met   | VUS               | -   | VUS               | PM2, PP2, PP3           | - | -   | -  | yes |
| MYH7        | missense | c.5159A>G | p.Asn1720Ser | ENST00000355349:c.5159A>G   | ENSP00000347507:p.Asn1720Ser  | VUS               | -   | VUS               | PM2, PP3                | - | -   | -  | yes |
| MYH7        | missense | c.535G>C  | p.Glu179Gln  | ENST00000355349:c.535G>C    | ENSP00000347507:p.Glu179Gln   | VUS               | -   | VUS               | PM2, PP2, PP3           | - | -   | -  | yes |
| MYH7        | missense | c.5615A>G | p.Gln1872Arg | ENST00000355349:c.5615A>G   | ENSP00000347507:p.Gln1872Arg  | VUS               | -   | VUS               | PM2                     | - | -   | -  | yes |
| MYH7        | missense | c.950A>G  | p.Glu317Gly  | ENST00000355349:c.950A>G    | ENSP00000347507:p.Glu317Gly   | VUS               | -   | VUS               | PM1, PM2                | - | -   | -  | yes |
| <b>MYL2</b> |          |           |              |                             |                               |                   |     |                   |                         |   |     |    |     |
| MYL2        | missense | c.374C>T  | p.Thr125Met  | ENST00000228841.15:c.374C>T | ENSP00000228841:p.Thr125Met   | VUS               | -   | VUS               | PM2, PP2                | 3 | 3   | 6  | no  |
| MYL2        | missense | c.401A>C  | p.Glu134Ala  | ENST00000228841.15:c.401A>C | ENSP00000228841.8:p.Glu134Ala | VUS               | -   | VUS               | PP2, PP3                | 5 | 3,5 | 14 | no  |
| MYL2        | missense | c.80A>G   | p.Gln27Arg   | ENST00000228841.15:c.80A>G  | ENSP00000228841.8:p.Gln27Arg  | VUS               | -   | VUS               | PM2, PP2                | 4 | 4   | 2  | no  |
| MYL2        | nonsense | c.190G>T  | p.Glu64X     | ENST00000228841:c.190G>T    | ENSP00000228841:p.Glu64*      | VUS               | -   | VUS               | PM2                     | - | -   | -  | yes |
| <b>MYL3</b> |          |           |              |                             |                               |                   |     |                   |                         |   |     |    |     |
| MYL3        | missense | c.170C>G  | p.Ala57Gly   | ENST00000292327.6:c.170C>G  | ENSP00000292327:p.Ala57Gly    | VUS               | -   | VUS               | BS1, PP2                | 5 | 3,7 | 8  | no  |
| MYL3        | missense | c.461G>A  | p.Arg154His  | ENST00000292327.6:c.461G>A  | ENSP00000292327.4:p.Arg154His | VUS               | -   | VUS               | PM2, PP2, PP3           | 5 | 3   | 8  | no  |
| MYL3        | missense | c.530A>G  | p.Glu177Gly  | ENST00000292327.6:c.530A>G  | ENSP00000292327.4:p.Glu177Gly | VUS               | -   | VUS               | PP2, PP3                | 3 | 3   | 13 | no  |
| MYL3        | missense | c.518T>C  | p.Met173Thr  | ENST00000292327:c.518T>C    | ENSP00000292327:p.Met173Thr   | VUS               | -   | VUS               | PM2, PP2                | 3 | 3   | 2  | no  |

|               |               |                 |             |                                 |                               |                   |                                |            |                              |   |      |    |     |
|---------------|---------------|-----------------|-------------|---------------------------------|-------------------------------|-------------------|--------------------------------|------------|------------------------------|---|------|----|-----|
| <b>PRKAG2</b> |               |                 |             |                                 |                               |                   |                                |            |                              |   |      |    |     |
| PRKAG2        | missense      | c.245A>C        | p.Gln82Pro  | ENST00000287878:c.245A>C        | ENSP00000287878:p.Gln82Pro    | VUS               | -                              | VUS        | PM2                          | 3 | 3    | 1  | no  |
| PRKAG2        | missense      | c.298G>A        | p.Gly100Ser | ENST00000287878:c.298G>A        | ENSP00000287878:p.Gly100Ser   | benign            | -                              | benign     | ExAC frequency               | 3 | 1,46 | 13 | no  |
| PRKAG2        | missense      | c.698C>G        | p.Ala233Gly | ENST00000287878:c.698C>G        | ENSP00000287878:p.Ala233Gly   | VUS               | -                              | VUS        | BS1                          | 3 | 2,72 | 11 | no  |
| PRKAG2        | missense      | c.425C>T        | p.Thr142Ile | ENST00000488258:c.425C>T        | ENSP00000287878:p.Thr142Ile   | VUS               | -                              | VUS        | BS1                          | 3 | 3    | 11 | no  |
| <b>PTPN11</b> |               |                 |             |                                 |                               |                   |                                |            |                              |   |      |    |     |
| PTPN11        | missense      | c.556C>T        | p.Arg186Trp | ENST00000351677:c.556C>T        | ENSP00000340944.2:p.Arg186Trp | VUS               | -                              | VUS        | PM2, PP2, PP3                | 3 | 2,75 | 4  | no  |
| <b>RAF1</b>   |               |                 |             |                                 |                               |                   |                                |            |                              |   |      |    |     |
| RAF1          | missense      | c.1837C>G       | p.Leu633Val | ENST00000442415.7:c.1897C>G     | ENSP00000401888.2:p.Leu633Val | pathogenic        | PP2, PM2, PS3, PS2             | VUS        | PM2                          | 5 | 4,8  | 11 | no  |
| RAF1          | missense      | c.770C>T        | p.Ser257Leu | ENST00000442415.7:c.770C>T      | ENSP00000401888.2:p.Ser257Leu | pathogenic        | PP2, PM1, PM2, PS3, PM6_Strong | VUS        | PM2                          | 5 | 5    | 29 | no  |
| <b>TNNC1</b>  |               |                 |             |                                 |                               |                   |                                |            |                              |   |      |    |     |
| TNNC1         | missense      | c.435C>A        | p.Asp145Glu | ENST00000232975.8:c.435C>A      | ENSP00000232975.3:p.Asp145Glu | VUS               | -                              | VUS        | PP2, BS1                     | 5 | 3,42 | 7  | no  |
| <b>TNNI3</b>  |               |                 |             |                                 |                               |                   |                                |            |                              |   |      |    |     |
| TNNI3         | missense      | c.485G>A        | p.Arg162Gln | ENST00000344887.10:c.485G>A     | ENSP00000341838:p.Arg162Gln   | pathogenic        | -                              | pathogenic | PM2, PP2, PP1, PS4           | 5 | 4,5  | 15 | no  |
| TNNI3         | missense      | c.497C>T        | p.Ser166Phe | ENST00000344887.10:c.497C>T     | ENSP00000341838.5:p.Ser166Phe | likely pathogenic | PS4                            | VUS        | PM2, PP2, PP3                | 5 | 4,4  | 7  | no  |
| TNNI3         | missense      | c.557G>A        | p.Arg186Gln | ENST00000344887.10:c.557G>A     | ENSP00000341838.5:p.Arg186Gln | pathogenic        | PS4, PP1                       | VUS        | PM2, PP2                     | 5 | 4,9  | 10 | no  |
| TNNI3         | missense      | c.248T>C        | p.Leu83Pro  | ENST00000344887:c.248T>C        | ENSP00000341838:p.Leu83Pro    | VUS               | -                              | VUS        | PM2, PP2                     | - | -    | -  | yes |
| TNNI3         | missense      | c.456T>A        | p.Asp152Glu | ENST00000344887:c.456T>A        | ENSP00000341838:p.Asp152Glu   | VUS               | -                              | VUS        | PM2, PP2                     | - | -    | -  | yes |
| <b>TNNT2</b>  |               |                 |             |                                 |                               |                   |                                |            |                              |   |      |    |     |
| TNNT2         | missense      | c.274C>T        | p.Arg92Trp  | ENST00000367318.10:c.274C>T     | ENSP00000236918:p.Arg102Trp   | pathogenic        | -                              | pathogenic | PS4, PM2, PM5, PP1, PP2, PP3 | 5 | 5    | 11 | no  |
| TNNT2         | missense      | c.538A>T        | p.Asn180Tyr | ENST00000367318:c.538A>T        | ENSP00000236918:p.Asn190Tyr   | VUS               | -                              | VUS        | PM2, PP2, PP1, PS4           | - | -    | -  | yes |
| TNNT2         | missense      | c.844A>G        | p.Lys282Glu | ENST00000367318:c.844A>G        | ENSP00000236918:p.Lys292Glu   | VUS               | -                              | VUS        | PM2, PP2                     | - | -    | -  | yes |
| TNNT2         | missense      | c.83C>T         | p.Ala28Val  | ENST00000367318:c.83C>T         | ENSP00000236918:p.Ala38Val    | VUS               | -                              | VUS        | PP2, BP4                     | 5 | 2,3  | 16 | no  |
| TNNT2         | inframe indel | c.487_489delGAG | p.Glu163del | ENST00000367318:c.487_489delGAG | ENSP00000236918:p.Glu173del   | pathogenic        | -                              | pathogenic | PS4, PM2, PM4, PP1           | 5 | 5    | 6  | no  |

|                    |            |             |                      |                             |                               |                   |          |                   |               |   |     |    |     |
|--------------------|------------|-------------|----------------------|-----------------------------|-------------------------------|-------------------|----------|-------------------|---------------|---|-----|----|-----|
| <i>TNNT2</i>       | missense   | c.832C>T    | p.Arg278Cys          | ENST00000367318:c.832C>T    | ENSP00000236918:p.Arg288Cys   | VUS               | -        | VUS               | PP2           | 5 | 3,9 | 23 | no  |
| <b><i>TPM1</i></b> |            |             |                      |                             |                               |                   |          |                   |               |   |     |    |     |
| <i>TPM1</i>        | missense   | c.331C>G    | p.Gln111Glu          | ENST00000403994.9:c.331C>G  | ENSP00000385107:p.Gln111Glu   | VUS               | -        | VUS               | PM2           | - | -   | -  | yes |
| <i>TPM1</i>        | missense   | c.790A>G    | p.Lys264Glu          | ENST00000403994.9:c.790A>G  | ENSP00000385107.4:p.Lys264Glu | VUS               | -        | VUS               | PM2, PP2, PP3 | 3 | 3   | 2  | no  |
| <i>TPM1</i>        | missense   | c.842T>C    | p.Met281Thr          | ENST00000403994.9:c.842T>C  | ENSP00000385107.4:p.Met281Thr | likely pathogenic | PS4, PP1 | VUS               | PM2, PP2      | 5 | 3,8 | 7  | no  |
| <i>TPM1</i>        | missense   | c.431A>G    | p.Gln144Arg          | ENST00000403994:c.431A>G    | ENSP00000385107:p.Gln144Arg   | VUS               | -        | VUS               | PM2, PP2, PP3 | - | -   | -  | yes |
| <i>TPM1</i>        | missense   | c.804A>C    | p.Lys268Asn          | ENST00000403994:c.804A>C    | ENSP00000385107:p.Lys268Asn   | VUS               | -        | VUS               | PM2, PP2      | - | -   | -  | yes |
| <b><i>TTN</i></b>  |            |             |                      |                             |                               |                   |          |                   |               |   |     |    |     |
| <i>TTN</i>         | frameshift | c.70437delG | p.Lys23480AsnfsTer30 | ENST00000589042:c.70437delG | ENSP00000467141:p.Lys23480fs  | likely pathogenic |          | likely pathogenic | PVS1, PM2     | - | -   | -  | yes |



Supplementary Table S3. Gene-level variant analysis, with the number (n) and the percentage (%) of variants identified in different genes [percentage is given as per class of variants (i.e. per P/LP, per VUS, per B/LB variants)]. Definitive: genes with definitive evidence for HCM association; moderate: genes with moderate evidence for HCM association; P/LP: pathogenic/likely pathogenic variant; VUS: variant of unknown significance; B/LB: benign/likely benign variant; LVH: left ventricular hypertrophy.

|                                   |               | P/LP, n (%) |          |                |            |             |         | VUS, n (%) |          |             |         | B/LB, n (%) |                  | Total n (%) |
|-----------------------------------|---------------|-------------|----------|----------------|------------|-------------|---------|------------|----------|-------------|---------|-------------|------------------|-------------|
|                                   |               | missense    | nonsense | splice variant | frameshift | inframe del | novel   | missense   | nonsense | inframe del | novel   | missense    | intronic variant |             |
| Definitive                        | <i>MYBPC3</i> | 3 (14)      | 5 (23)   | 3 (14)         | 10 (45)    | 1 (5)       | 4 (18)  | 9 (100)    | -        | -           | 2 (22)  | 6 (100)     | -                | 37 (100)    |
|                                   | <i>MYH7</i>   | 17 (100)    | -        | -              | -          | -           | -       | 10 (83)    | 1 (8)    | 1 (8)       | 8 (67)  | 1 (100)     | -                | 30 (100)    |
|                                   | <i>TNNT2</i>  | 1 (50)      | -        | -              | -          | 1 (50)      | -       | 4 (100)    | -        | -           | 2 (50)  | -           | -                | 6 (100)     |
|                                   | <i>TNNI3</i>  | 3 (100)     | -        | -              | -          | -           | -       | 2 (100)    | -        | -           | 2 (100) | -           | -                | 5 (100)     |
|                                   | <i>TPM1</i>   | 1 (100)     | -        | -              | -          | -           | -       | 4 (100)    | -        | -           | 3 (75)  | -           | -                | 5 (100)     |
|                                   | <i>ACTC1</i>  | 1 (100)     | -        | -              | -          | -           | -       | 2 (100)    | -        | -           | 1 (50)  | -           | -                | 3 (100)     |
|                                   | <i>MYL2</i>   | -           | -        | -              | -          | -           | -       | 3 (75)     | 1 (25)   | -           | 1 (25)  | -           | -                | 4 (100)     |
|                                   | <i>MYL3</i>   | -           | -        | -              | -          | -           | -       | 4 (100)    | -        | -           | -       | -           | -                | 4 (100)     |
| Moderate                          | <i>CSRP3</i>  | -           | -        | -              | -          | -           | -       | 3 (100)    | -        | -           | -       | 1 (100)     | -                | 4 (100)     |
|                                   | <i>TNNC1</i>  | -           | -        | -              | -          | -           | -       | 1 (100)    | -        | -           | -       | -           | -                | 1 (100)     |
|                                   | <i>JPH2</i>   | -           | -        | -              | -          | -           | -       | 4 (100)    | -        | -           | 4 (100) | 2 (100)     | -                | 6 (100)     |
| Syndromic genes with isolated LVH | <i>ACTN2</i>  | -           | -        | -              | -          | -           | -       | 2 (100)    | -        | -           | -       | 2 (100)     | -                | 4 (100)     |
|                                   | <i>DES</i>    | 1 (100)     | -        | -              | -          | -           | -       | 5 (100)    | -        | -           | 2 (40)  | 1 (100)     | -                | 7 (100)     |
|                                   | <i>FHL1</i>   | -           | 1 (100)  | -              | -          | -           | 1 (100) | 1 (100)    | -        | -           | -       | -           | -                | 2 (100)     |
|                                   | <i>RAF1</i>   | 2 (100)     | -        | -              | -          | -           | -       | -          | -        | -           | -       | -           | -                | 2 (100)     |
|                                   | <i>PRKAG2</i> | -           | -        | -              | -          | -           | -       | 3 (100)    | -        | -           | -       | 1 (100)     | -                | 4 (100)     |
|                                   | <i>LAMP2</i>  | -           | -        | -              | -          | -           | -       | -          | -        | -           | -       | 2 (67)      | 1 (33)           | 3 (100)     |
|                                   | <i>PTPN11</i> | -           | -        | -              | -          | -           | -       | 1 (100)    | -        | -           | -       | -           | -                | 1 (100)     |
| Other                             | mitochondrial | 1 (100)     | -        | -              | -          | -           | -       | -          | -        | -           | -       | -           | -                | 1 (100)     |
|                                   | <i>TTN</i>    | -           | -        | -              | 1 (100)    | -           | 1 (100) | -          | -        | -           | -       | -           | -                | 1 (100)     |
